# Supplementary material
Source: PubMed Central journal article supplement (PMC5027734)

## Appendix

**Table A1: Initial values for vaccine efficacy (source: van Hoek et al. (5))**

| Age groups (years) | Vaccine efficacy for a duration of protection of 9,5 years | Additional efficacy against PHN |
|--------------------|------------------------------------------------------------|---------------------------------|
| 60-64              | 75%                                                        | 0%                              |
| 65-69              | 73%                                                        | 0%                              |
| 70-74              | 51%                                                        | 44% (during 10 years)           |
| 75 and older       | 37%                                                        | 44% (during 5 years)            |

**Table A2: Mean results of the LTPS study by age of enrollment in the SPS study- 10 years after vaccination (6).**

| Age at enrollment in SPS study | Decrease in HZ incidence (CI 95%) | Decrease in PHN incidence (CI 95%) |
|--------------------------------|-----------------------------------|------------------------------------|
| 60-69 years old                | 20.2% (6.7-32.2)                  | 17.1% (-31.0-50.9)                 |
| 70 years and older             | 22.4% (6.0-36.6)                  | 49.7% (15.6-72.5)                  |

**Table A3: French parameters used in the model (base case scenario and sensitivity analysis)**

| Age groups (years)               | Base case analysis                                           |                                                               | Deterministic sensitivity analysis                                                 |             |
|----------------------------------|--------------------------------------------------------------|---------------------------------------------------------------|------------------------------------------------------------------------------------|-------------|
|                                  |                                                              |                                                               | Low value                                                                          | High value  |
|                                  | <b>HZ and PHN epidemiology</b>                               | <b>HZ annual incidence (Gonzalez Chiappe et al. (8))</b>      | <b>PHN proportion (adapted from Bouhassira et al. (10) and van Hoek et al.(5))</b> |             |
|                                  |                                                              |                                                               | <b>HZ annual incidence</b>                                                         |             |
| 60-64                            |                                                              | 0.76%                                                         | 11.75%                                                                             | 0.61% 0.87% |
| 65-69                            |                                                              | 0.86%                                                         | 13.00%                                                                             | 0.74% 0.98% |
| 70-74                            |                                                              | 0.99%                                                         | 15.00%                                                                             | 0.83% 1.16% |
| 75-79                            |                                                              | 1.03%                                                         | 17.00%                                                                             | 0.76% 1.07% |
| 80-84                            |                                                              | 1.15%                                                         | 19.25%                                                                             | 0.94% 1.38% |
| ≥ 85                             |                                                              | 1.10%                                                         | 19.75%                                                                             | 0.90% 1.38% |
| <b>Mean cost (euros)</b>         | <b>HZ (Mick et al. (9), PMSI database, own calculations)</b> | <b>PHN (Mick et al. (9), PMSI database, own calculations)</b> | <b>HZ</b>                                                                          | <b>PHN</b>  |
| 60-64                            | 180                                                          | 313                                                           | 146                                                                                | 236         |
| 65-69                            | 191                                                          | 323                                                           | 157                                                                                | 246         |
| 70-74                            | 215                                                          | 344                                                           | 179                                                                                | 265         |
| 75-79                            | 257                                                          | 382                                                           | 219                                                                                | 301         |
| 80-84                            | 315                                                          | 434                                                           | 273                                                                                | 350         |
| ≥ 85                             | 431                                                          | 539                                                           | 381                                                                                | 449         |
| <b>Vaccination costs (euros)</b> |                                                              | 137.5                                                         |                                                                                    | 162.5       |
| <b>Discount rate (%)</b>         |                                                              | 4%                                                            |                                                                                    | 6%          |

HZ : Herpes zoster, PHN : Post herpetic Neuralgia, PMSI : national hospital discharge database

Figure A1. Markov model structure adapted from van Hoek et al. (5)

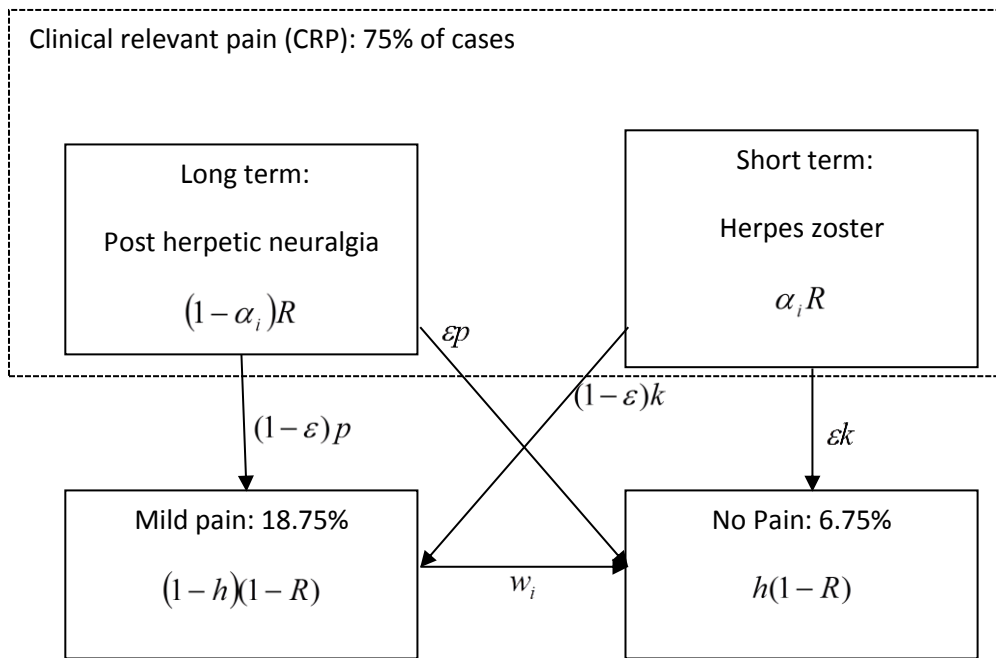

| Model parameters                                                                     | Values |
|--------------------------------------------------------------------------------------|--------|
| $k$ : rate of loss short term CRP                                                    | 0.360  |
| $p$ : rate of loss long term CRP                                                     | 12.4   |
| $\varepsilon$ : fraction of patients moving directly to "No pain"                    | 94%    |
| $R$ : Proportion of patients in CRP at time 0                                        | 75%    |
| $h$ : Proportion of patients not in CRP who are in mild pain at time 0               | 25%    |
| $\alpha$ : Proportion of CRP patients of age $i$ in the "short term" group at time 0 | 0.001  |
| $w$ : Recovery rate from mild pain to no pain for age $i$                            | 0.61   |

Figure A2. QALY loss per year by age (data from van Hoek et al. (5))

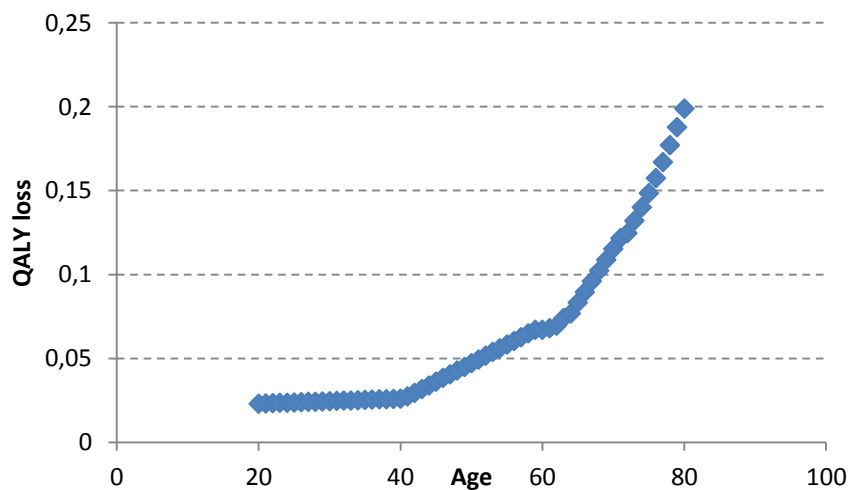

**Figure A3 : Initial distribution of patients according to the four health states (French Model)**

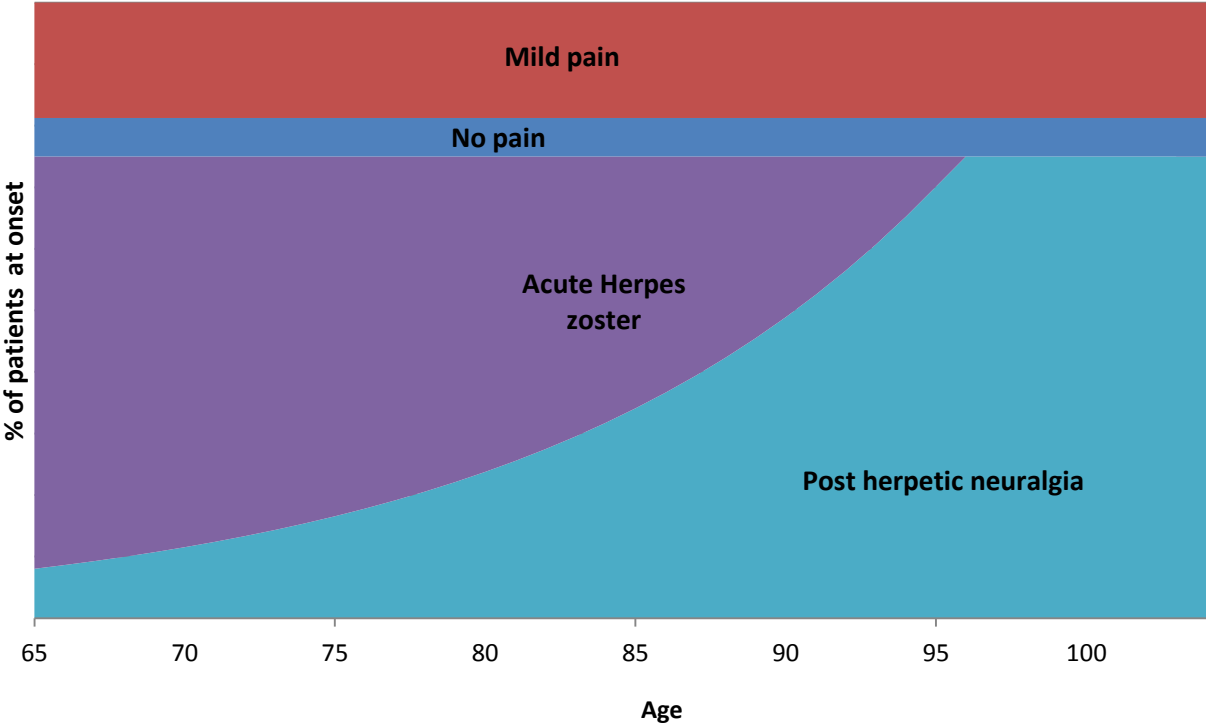

**Figure A4: Vaccine efficacies, by age groups, observed in the LTPS study (6) and estimated by van Hoek et al. (5) for a mean duration of protection of 9.5 years**

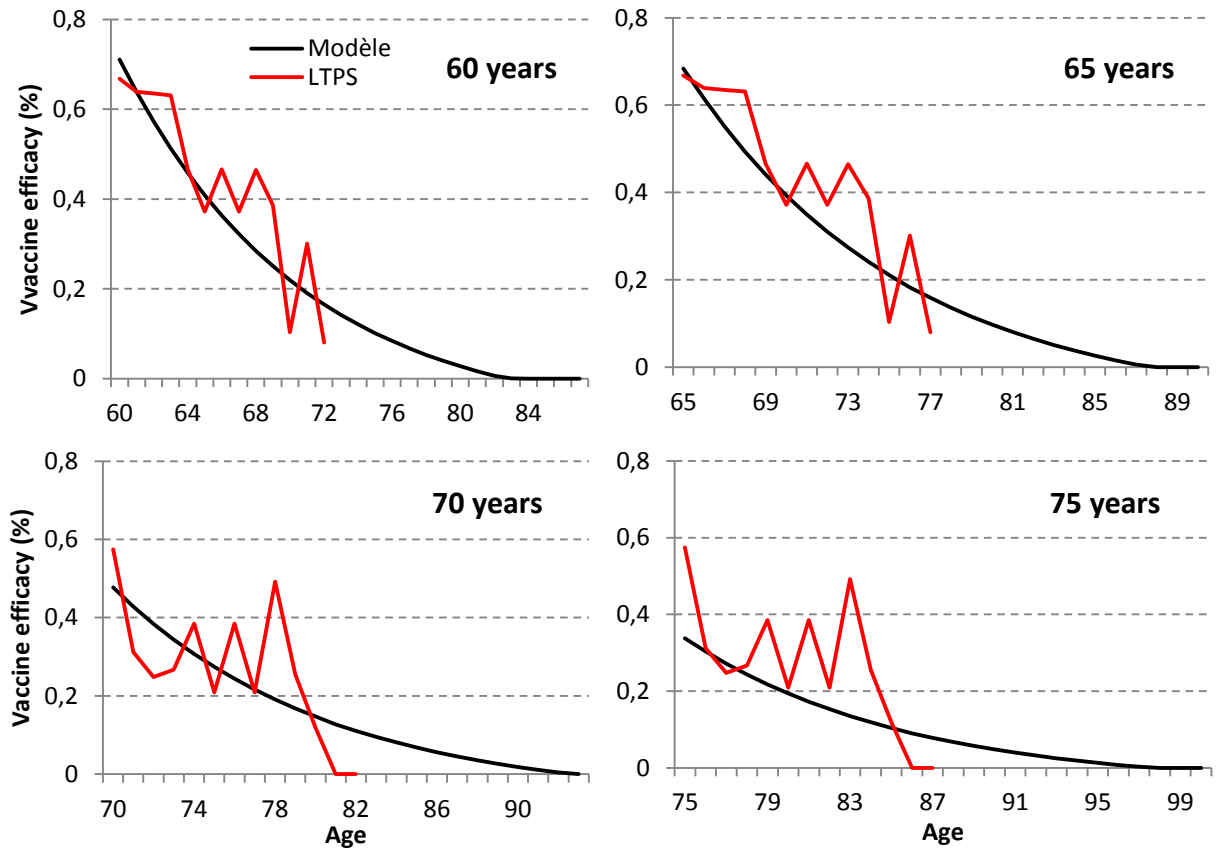

Supplement: khvi-12-09-1184801-s001.pdf [file khvi-12-09-1184801-s001.pdf]
